# Supplementary material
Source: MDPI journal article supplement (https://www.mdpi.com/2077-0472/13/9/1719)
Supplement: s1 [file s1]

Table S1. Significance levels of two-way ANOVA for allelochemical type (i.e., C, MC, and EC) and concentration (i.e., 0.1 mM and 1.0 mM) on seed germination and seedling growth performance of the native plant *L. indica*, and their relationship interaction between.

| Variable                   | Allelochemical type(T) |          | Allelochemical concentration(C) |          | T×C    |          |
|----------------------------|------------------------|----------|---------------------------------|----------|--------|----------|
|                            | F                      | <i>p</i> | F                               | <i>p</i> | F      | <i>p</i> |
| <b>Seed germination</b>    |                        |          |                                 |          |        |          |
| Seed germination rate      | 3.594                  | 0.067    | 6.905                           | 0.025    | 3.700  | 0.063    |
| Seed germination potential | 0.556                  | 0.590    | 3.306                           | 0.099    | 1.839  | 0.209    |
| Seed germination index     | 6.409                  | 0.016    | 19.598                          | <0.001   | 2.142  | 0.168    |
| Seed germination speed     | 5.723                  | 0.022    | 16.015                          | 0.003    | 2.902  | 0.101    |
| Seed vigor index           | 11.084                 | 0.003    | 53.053                          | <0.001   | 3.706  | 0.062    |
| <b>Seedling growth</b>     |                        |          |                                 |          |        |          |
| Root length                | 73.437                 | <0.001   | 209.631                         | <0.001   | 22.854 | <0.001   |
| Biomass                    | 0.263                  | 0.772    | 17.987                          | <0.001   | 0.465  | 0.636    |
| Leaf length                | 8.003                  | 0.003    | 74.703                          | <0.001   | 11.198 | <0.001   |
| Leaf width                 | 10.458                 | <0.001   | 23.684                          | <0.001   | 1.338  | 0.287    |

Table S2. The significant level of two-factor ANOVA of allelochemicals types (C, MC and EC) and concentrations (0.1mM and 1.0mM) on the relative competitive intensity and relative dominance index of invasive plant *S.canadensis* and native plant *L.indica*, and the interaction between them.

| Variable                      | Allelochemical type(T) |          | Allelochemical concentration(C) |          | T×C    |          |
|-------------------------------|------------------------|----------|---------------------------------|----------|--------|----------|
|                               | F                      | <i>p</i> | F                               | <i>p</i> | F      | <i>p</i> |
| <b><i>S.canadensis</i></b>    |                        |          |                                 |          |        |          |
| Relative competition strength | 0.285                  | 0.757    | 26.346                          | <0.001   | 10.902 | 0.002    |
| Relative dominance index      | 11.296                 | 0.002    | 2.554                           | 0.136    | 1.312  | 0.305    |
| <b><i>L.indica</i></b>        |                        |          |                                 |          |        |          |
| Relative competition strength | 8.260                  | 0.006    | 0.253                           | 0.624    | 6.038  | 0.015    |
| Relative dominance index      | 11.296                 | 0.002    | 2.554                           | 0.136    | 1.312  | 0.305    |
